# Supplementary material
Source: publisher figshare collection journal article supplement (https://asha.figshare.com/articles/dataset/_/13345202)
Supplement: Supplementary file 2 [file 1]

**Supplemental Material S4.** Session-by-session summary of intervention targets and materials.

| Session # | Activities                      | Target regular past tense verbs                                                                                               | Syntactic frame; Elicitation phrase (1 <sup>st</sup> or 3 <sup>rd</sup> person?)                      | Materials                                                                                      |
|-----------|---------------------------------|-------------------------------------------------------------------------------------------------------------------------------|-------------------------------------------------------------------------------------------------------|------------------------------------------------------------------------------------------------|
| 1         | Activity 1: Introduction        | [t]: kicked<br>[d]: hugged<br>[əd]: skated                                                                                    | SVO; 3 <sup>rd</sup> person (e.g., <i>The puppet kicks the ball. What DID it just DO?</i> )           | Boy/girl puppets, ball, skateboard                                                             |
|           | Activity 2: Playdough           | [t]: squashed, stretched, poked, pinched, pushed, swapped, chopped<br>[d]: rolled, pulled, flattened, rubbed<br>[əd]: twisted | SVO; 1 <sup>st</sup> person (e.g., <i>You roll the playdough. What DID you just DO?</i> )             | Playdough                                                                                      |
| 2         | Activity 1: Rice and containers | [t]: mixed<br>[d]: poured<br>[əd]: tasted                                                                                     | SVO/A; 1 <sup>st</sup> person (e.g., <i>You pour the rice (into the cup). What DID you just DO?</i> ) | Rice, cups, bowls, plates, spoons                                                              |
|           | Activity 2: Drums               | [t]: marched, balanced, clapped, tapped, knocked<br>[d]: twirled, waved<br>[əd]: lifted, collected, rested                    | SV/O; 1 <sup>st</sup> person (e.g., <i>You tap the drum. What DID you just DO?</i> )                  | Drum, drum sticks                                                                              |
| 3         | Activity 1: Exploring nature    | [t]: looked, searched, watched<br>[d]: spied, viewed, explored<br>[əd]: counted                                               | SV/O; 1 <sup>st</sup> person (e.g., <i>You spy the spider. What DID you just DO?</i> )                | Binoculars, magnifying glass, creepy crawly manipulatives (e.g., spider, frog, mouse, fly)     |
|           | Activity 2: Snakes and Ladders  | [t]: raced, placed<br>[d]: wriggled, slithered, rolled<br>[əd]: landed                                                        | SV/O/A; 1 <sup>st</sup> person (e.g., <i>You roll the dice. What DID you just DO?</i> )               | Snakes and Ladders board, dice, counters                                                       |
| 4         | Activity 1: Frogs               | [t]: flipped<br>[d]: dived<br>[əd]: rested                                                                                    | SV/A; 3 <sup>rd</sup> person (e.g., <i>The frog flips (into the bucket). What DID it just DO?</i> )   | Frogs, bowl, bucket                                                                            |
|           | Activity 2: Garden creatures    | [t]: chased, attacked, chirped, sipped, sucked<br>[d]: fluttered, hummed, moved, carried, hurried, chewed                     | SV/O; 3 <sup>rd</sup> person (e.g., <i>The butterfly flutters its wings. What DID it just DO?</i> )   | Garden creature manipulatives (e.g., butterfly, spider, bee, frog, ladybug, dragonfly, beetle) |

|   |                                   |                                                                                                                                                                                                |                                                                                                                                                                                        |                                                                                                              |
|---|-----------------------------------|------------------------------------------------------------------------------------------------------------------------------------------------------------------------------------------------|----------------------------------------------------------------------------------------------------------------------------------------------------------------------------------------|--------------------------------------------------------------------------------------------------------------|
| 5 | Activity 1: Blocks                | [æd]: collected, visited, glided<br>[t]: knocked, stacked, grouped, balanced<br>[d]: piled, flattened, lined (up), wobbled, moved, pulled<br>[æd]: separated, created, started, ended, counted | SVO; 1 <sup>st</sup> person (e.g., <i>You stack the blocks. What DID you just DO?</i> )                                                                                                | Blocks                                                                                                       |
|   | Activity 2: “Don’t Rock the Boat” | [t]: rocked, tipped<br>[d]: spilled<br>[æd]: added                                                                                                                                             | SV/O; 1 <sup>st</sup> (e.g., <i>You rock the boat. What DID you just DO?</i> ) and 3 <sup>rd</sup> person (e.g., <i>The boat rocks. What DID it just DO?</i> )                         | “Don’t Rock the Boat” commercial game                                                                        |
| 6 | Activity 1: Sea creatures         | [t]: placed, pushed<br>[d]: dived, explored<br>[æd]: lifted, drifted                                                                                                                           | SV/O/A; 1 <sup>st</sup> (e.g., <i>You place the dolphin (in the water). What DID you just DO?</i> ) and 3 <sup>rd</sup> person (e.g., <i>The dolphin dives. What DID it just DO?</i> ) | Sea creature manipulatives (e.g., dolphin, whale, shark, seal, stingray)                                     |
|   | Activity 2: Farm animals          | [t]: barked, chirped, clucked, quacked, oinked, honked<br>[d]: baaed, he-hawed, meowed, mooed, neighed, purred<br>[æd]: bleated, trotted                                                       | SV; 3 <sup>rd</sup> person (e.g., <i>The dog barks. What DID it just DO?</i> )                                                                                                         | Farm animal manipulatives (e.g., dog, bird, chicken, duck, pig, goose, sheep, donkey, cat, cow, horse, goat) |
| 7 | Activity 1: Road vehicles         | [t]: pushed, stopped, raced<br>[d]: rolled, pulled<br>[æd]: waited                                                                                                                             | SV/O/A; 1 <sup>st</sup> person (e.g., <i>You push the car (on the road). What DID you just DO?</i> ) and 3 <sup>rd</sup> person (e.g., <i>The car rolls. What DID it just DO?</i> )    | Variety of toy road vehicles (e.g., car, truck, van), road play mat                                          |
|   | Activity 2: “Connect Four”        | [t]: dropped, placed<br>[d]: played, offered<br>[æd]: connected, counted                                                                                                                       | SVO/IDO; 1 <sup>st</sup> person (e.g., <i>You offered me a turn. What DID you just DO?</i> )                                                                                           | “Connect Four” commercial game                                                                               |
| 8 | Activity 1: “Phil the Fridge”     | [t]: grouped, poked, scooped, watched, switched, mixed, locked                                                                                                                                 | SV/O/A; 1 <sup>st</sup> person (e.g., <i>You group the pieces. What DID you just DO?</i> )                                                                                             | “Phil the Fridge” commercial game                                                                            |

|    |                               |                                                                                                                               |                                                                                                                                                                           |                                                   |
|----|-------------------------------|-------------------------------------------------------------------------------------------------------------------------------|---------------------------------------------------------------------------------------------------------------------------------------------------------------------------|---------------------------------------------------|
|    |                               | [d]: filled, opened, closed, twirled, smiled, showed<br>[əɪ]: separated, wasted                                               |                                                                                                                                                                           |                                                   |
|    | Activity 2: “Treasure Island” | [t]: looked<br>[d]: turned<br>[əɪ]: twisted                                                                                   | SVO/A; 1 <sup>st</sup> person (e.g., <i>You looked under the barrel. What DID you just DO?</i> )                                                                          | “Treasure Island” commercial game                 |
| 9  | Activity 1: Bowling           | [t]: knocked, replaced, bumped<br>[d]: hurled<br>[əɪ]: lifted, collected                                                      | SVO; 1 <sup>st</sup> person (e.g., <i>You knocked the pins. What DID you just DO?</i> )                                                                                   | Toy bowling set (i.e., 10 pins, bowling bowls)    |
|    | Activity 2: “Pop Up Pirate”   | [t]: picked, placed, popped<br>[d]: played, stabbed, moved<br>[əɪ]: collected, counted, landed                                | SV/O/A; 1 <sup>st</sup> person (e.g., <i>You pop the pirate. What DID you just DO?</i> ) and 3 <sup>rd</sup> person (e.g., <i>The pirate pops. What DID it just DO?</i> ) | “Pop Up Pirate” commercial game                   |
| 10 | Activity 1: Boardgame         | [t]: missed<br>[d]: rolled<br>[əɪ]: shifted                                                                                   | SVO; 1 <sup>st</sup> person (e.g., <i>You shift your counter. What DID you just DO?</i> )                                                                                 | Any freely downloadable boardgame, dice, counters |
|    | Activity 2: Playdough         | [t]: squashed, stretched, poked, pinched, pushed, swapped, chopped<br>[d]: rolled, pulled, flattened, rubbed<br>[əɪ]: twisted | SVO; 1 <sup>st</sup> person (e.g., <i>You roll the playdough. What DID you just DO?</i> )                                                                                 | Playdough                                         |

Notes. S = subject; V = verb; O = object; A = adverbial. “ ” indicates commercial games.
