# Supplementary material
Source: publisher figshare collection journal article supplement (https://asha.figshare.com/articles/dataset/_/13345202)
Supplement: Supplementary file 4 [file 1]

**Supplemental Material S1.** 2010 checklist of information to include when reporting a randomised trial (Schulz, Altman, & Moher, 2010).

| Section/Topic             | Item # | Checklist item                                                                                                                                                                                                                                                                                      | Reported on page # |
|---------------------------|--------|-----------------------------------------------------------------------------------------------------------------------------------------------------------------------------------------------------------------------------------------------------------------------------------------------------|--------------------|
| Title and abstract        |        |                                                                                                                                                                                                                                                                                                     |                    |
|                           | 1a     | Identification as a randomised trial in the title                                                                                                                                                                                                                                                   | N/R                |
|                           | 1b     | Structured summary of trial design, methods, results, and conclusions (for specific guidance see CONSORT for abstracts (see Hopewell S Clarke, Moher, Wager, Middleton, Altman, Schulz, & CONSORT Group, 2008a; Hopewell S Clarke, Moher, Wager, Middleton, Altman, Schulz, & CONSORT Group, 2008b) | 1                  |
| Introduction              |        |                                                                                                                                                                                                                                                                                                     |                    |
| Background and objectives | 2a     | Scientific background and explanation of rationale                                                                                                                                                                                                                                                  | 1-4                |
|                           | 2b     | Specific objectives or hypotheses                                                                                                                                                                                                                                                                   | 4                  |
| Methods                   |        |                                                                                                                                                                                                                                                                                                     |                    |
| Trial design              | 3a     | Description of trial design (such as parallel, factorial) including allocation ratio                                                                                                                                                                                                                | 4                  |
|                           | 3b     | Important changes to methods after trial commencement (such as eligibility criteria), with reasons                                                                                                                                                                                                  | N/A                |
| Participants              | 4a     | Eligibility criteria for participants                                                                                                                                                                                                                                                               | 4                  |
|                           | 4b     | Settings and locations where the data were collected                                                                                                                                                                                                                                                | 6                  |
| Interventions             | 5      | The interventions for each group with sufficient details to allow replication, including how and when they were actually administered                                                                                                                                                               | Table S3, Table S4 |
| Outcomes                  | 6a     | Completely defined pre-specified primary and secondary outcome measures, including how and when they were assessed                                                                                                                                                                                  | 5 (Figure 1); 7-10 |
|                           | 6b     | Any changes to trial outcomes after the trial commenced, with reasons                                                                                                                                                                                                                               | N/A                |
| Sample size               | 7a     | How sample size was determined                                                                                                                                                                                                                                                                      | N/R                |
|                           | 7b     | When applicable, explanation of any interim analyses and stopping guidelines                                                                                                                                                                                                                        | N/A                |
| Randomisation:            |        |                                                                                                                                                                                                                                                                                                     |                    |
| Sequence generation       | 8a     | Method used to generate the random allocation sequence                                                                                                                                                                                                                                              | 5                  |
|                           | 8b     | Type of randomisation; details of any restriction (such as blocking and block size)                                                                                                                                                                                                                 | 5                  |

|                                                      |     |                                                                                                                                                                                              |             |
|------------------------------------------------------|-----|----------------------------------------------------------------------------------------------------------------------------------------------------------------------------------------------|-------------|
| Allocation concealment mechanism                     | 9   | Mechanism used to implement the random allocation sequence (such as sequentially numbered containers), describing any steps taken to conceal the sequence until interventions were assigned  | 5           |
| Implementation                                       | 10  | Who generated the random allocation sequence, who enrolled participants, and who assigned participants to interventions                                                                      | 5           |
| Blinding                                             | 11a | If done, who was blinded after assignment to interventions (for example, participants, care providers, those assessing outcomes) and how                                                     | 5-6         |
|                                                      | 11b | If relevant, description of the similarity of interventions                                                                                                                                  | 6-7         |
| Statistical methods                                  | 12a | Statistical methods used to compare groups for primary and secondary outcomes                                                                                                                | 7-10        |
|                                                      | 12b | Methods for additional analyses, such as subgroup analyses and adjusted analyses                                                                                                             | N/A         |
| Results                                              |     |                                                                                                                                                                                              |             |
| Participant flow (a diagram is strongly recommended) | 13a | For each group, the numbers of participants who were randomly assigned, received intended treatment, and were analysed for the primary outcome                                               | Figure S1   |
|                                                      | 13b | For each group, losses and exclusions after randomisation, together with reasons                                                                                                             | 7           |
| Recruitment                                          | 14a | Dates defining the periods of recruitment and follow-up                                                                                                                                      | N/R         |
|                                                      | 14b | Why the trial ended or was stopped                                                                                                                                                           | 6           |
| Baseline data                                        | 15  | A table showing baseline demographic and clinical characteristics for each group                                                                                                             | 6 (Table 1) |
| Numbers analysed                                     | 16  | For each group, number of participants (denominator) included in each analysis and whether the analysis was by original assigned groups                                                      | 7           |
| Outcomes and estimation                              | 17a | For each primary and secondary outcome, results for each group, and the estimated effect size and its precision (such as 95% confidence interval)                                            | 7-10        |
|                                                      | 17b | For binary outcomes, presentation of both absolute and relative effect sizes is recommended                                                                                                  | N/A         |
| Ancillary analyses                                   | 18  | Results of any other analyses performed, including subgroup analyses and adjusted analyses, distinguishing pre-specified from exploratory                                                    | 10          |
| Harms                                                | 19  | All important harms or unintended effects in each group (for specific guidance see CONSORT for harms (see Ioannidis, Evans, Gøtzsche, O'Neill, Altman, Schulz, Moher, & CONSORT Group, 2004) | N/A         |
| Discussion                                           |     |                                                                                                                                                                                              |             |
| Limitations                                          | 20  | Trial limitations, addressing sources of potential bias, imprecision, and, if relevant, multiplicity of analyses                                                                             | 12          |

|                   |    |                                                                                                               |       |
|-------------------|----|---------------------------------------------------------------------------------------------------------------|-------|
| Generalisability  | 21 | Generalisability (external validity, applicability) of the trial findings                                     | 12    |
| Interpretation    | 22 | Interpretation consistent with results, balancing benefits and harms, and considering other relevant evidence | 10-11 |
| Other information |    |                                                                                                               |       |
| Registration      | 23 | Registration number and name of trial registry                                                                | N/A   |
| Protocol          | 24 | Where the full trial protocol can be accessed, if available                                                   | N/A   |
| Funding           | 25 | Sources of funding and other support (such as supply of drugs), role of funders                               | 12    |

Notes. N/R = not reported. N/A = not applicable.

## References

- Hopewell, S., Clarke, M., Moher, D., Wager, E., Middleton, P., Altman, D. G., Schulz, K. F., & CONSORT Group. (2008a). CONSORT for reporting randomised trials in journal and conference abstracts. *Lancet*, 371. 281–283. [https://doi.org/10.1016/S0140-6736\(07\)61835-2](https://doi.org/10.1016/S0140-6736(07)61835-2).
- Hopewell, S., Clarke, M., Moher, D., Wager, E., Middleton, P., Altman, D. G., Schulz, K. F., & CONSORT Group. (2008b). CONSORT for reporting randomized controlled trials in journal and conference abstracts: explanation and elaboration. *PLoS Med.*, 5. e20. <https://doi.org/10.1371/journal.pmed.0050020>
- Ioannidis, J. P., Evans, S. J., Gøtzsche, P. C., O'Neill, R. T., Altman, D. G., Schulz, K., Moher, D., & CONSORT Group (2004). Better reporting of harms in randomized trials: an extension of the CONSORT statement. *Annals of Internal Medicine*, 141. 781-8. <https://doi.org/10.7326/0003-4819-141-10-200411160-00009>.
- Schulz, K. F., Altman, D. G., & Moher, D. (2010). CONSORT 2010 statement: updated guidelines for reporting parallel group randomised trials. *BMJ*, 340, c332. <https://doi.org/10.1136/bmj.c332>
